# 1 Global priorities for conservation of reptilian 2 phylogenetic diversity in the face of human impacts

3

4 Rikki Gumbs<sup>1,2,3\*</sup>, Claudia L. Gray<sup>3</sup>, Monika Böhm<sup>4</sup>, Michael Hoffmann<sup>5</sup>, Richard Grenyer<sup>6</sup>, Walter Jetz<sup>7</sup>,

5 Shai Meiri<sup>8,9</sup>, Uri Roll<sup>10</sup>, Nisha R. Owen<sup>11</sup>, James Rosindell<sup>1</sup>

6 1. Department of Life Sciences, Imperial College London, Silwood Park Campus, Ascot, Berkshire, SL5

7 7PY, United Kingdom

8 2. Science and Solutions for a Changing Planet DTP, Grantham Institute, Imperial College London,

9 South Kensington, London

10 3. EDGE of Existence Programme, Zoological Society of London, Regent's Park, London, United

11 Kingdom

12 4. Institute of Zoology, Zoological Society of London, Regent's Park, London, United Kingdom

13 5. Conservation and Policy, Zoological Society of London, Regent's Park, London, United Kingdom

14 6. School of Geography and the Environment, University of Oxford, Oxford, OX1 3QY, United Kingdom

15 7. Ecology and Evolutionary Biology Department, Yale University, 165 Prospect Street, New Haven, CT

16 06511, USA

17 8. School of Zoology, Tel Aviv University, 6997801, Tel Aviv, Israel

18 9. Steinhardt Museum of Natural History, Tel Aviv University, 6997801, Tel Aviv, Israel

19 10. Mitrani Department of Desert Ecology, Ben-Gurion University of the Negev, Midreshet Ben-Gurion

20 8499000, Israel

21 11. On The EDGE Conservation, London, United Kingdom

22 \*r.gumbs@imperial.ac.uk

## 23 Abstract

24 Phylogenetic Diversity (PD) is increasingly recognised as an important measure that can provide  
25 information on evolutionary and functional aspects of biodiversity for conservation planning that are  
26 not readily captured by species diversity. Here we develop and analyse two new metrics that combine  
27 the effects of PD and human encroachment on species range size — one metric valuing regions and  
28 another enabling species prioritisation. We evaluate these metrics for reptiles, which have been  
29 largely neglected in previous studies, and contrast these results with equivalent calculations for all  
30 terrestrial vertebrate groups. We find that high human impacted areas unfortunately coincide with  
31 the most valuable areas of reptilian diversity, more than expected by chance. We also find that, under  
32 our species-level metric, the highest priority reptile species score far above the top mammal and bird  
33 species, and they include a disproportionate number of species with insufficient information on  
34 potential threats. Such Data Deficient species are, in terms of our metric, comparable to Critically  
35 Endangered species and may require urgent conservation attention.

36

## 37 Introduction

38 We are in the midst of a global biodiversity crisis<sup>1,2</sup> with severely limited resources for conservation  
39 action<sup>3</sup>. At current extinction rates, we are set to experience unprecedented losses of species and  
40 their Phylogenetic Diversity (PD). PD is the sum of the phylogenetic branch lengths connecting a set of  
41 species to each other across their phylogenetic tree, and measures their collective contribution to the  
42 tree of life<sup>4,5</sup>. PD is increasingly recognised as an important component of global biodiversity<sup>6,7</sup> with  
43 value for human well-being<sup>4,8,9</sup>. As PD extends beyond the simple counting of species to quantify the  
44 amount of variation across a set of species<sup>4</sup>, it is a valuable tool for differentiating among species and  
45 regions for conservation prioritisation<sup>5,10-12</sup>.

46 A large body of literature has explored how PD can be conserved across mammals and birds<sup>5,7,10,13–16</sup>  
47 but reptiles remain poorly studied in global conservation schemes<sup>17</sup>, despite comprising ~30% of  
48 terrestrial vertebrate species richness<sup>18</sup>. Almost one in five reptile species are threatened with  
49 extinction<sup>19</sup> and reptile populations have suffered average global declines of around 55% between  
50 1970 and 2012<sup>20</sup>. Existing protected areas and global conservation schemes represent reptiles poorly  
51 compared with birds and mammals<sup>21</sup>. Consequently, there is a pressing need to assess all reptiles to  
52 enable targeted conservation and allow the incorporation of reptiles into global analyses of  
53 conservation priorities.

54 There are several methods available for mapping imperilled PD<sup>7,12,13,22,23</sup> and, in lieu of explicit  
55 extinction risk data, small range size has often been used to identify regions of high conservation  
56 value<sup>12,13</sup>. However, whilst these methods prioritise highly irreplaceable regions, they do not  
57 incorporate spatial measures of vulnerability, such as human impact, thus limiting their potential  
58 practical application in conservation planning<sup>24,25</sup>. Unfortunately, while range data to roughly 100 km  
59 scale are now available for 99% of reptiles<sup>21</sup>, up-to-date extinction risk data (i.e. published in the past  
60 ten years<sup>26,27</sup>) are available for less than half of reptile species<sup>27</sup>. In the absence of comprehensive  
61 extinction risk assessments for all reptiles, range data must be combined with existing environmental  
62 data to determine spatial vulnerability<sup>28–30</sup>.

63 The Human Footprint index (HF)<sup>30,31</sup> is the most comprehensive and high-resolution dataset of human  
64 pressures on global environments. It combines eight variables—including crop and pasture land,  
65 extent of built environments, human population density and night-time lights—which measure direct  
66 and indirect impacts of humans on the environment<sup>30</sup>. Such comprehensive global maps of  
67 cumulative human pressures have been shown to be better predictors of species distributions than  
68 biological traits<sup>32</sup> and are a strong predictor of species extinction risk<sup>33</sup>. However, to our knowledge,  
69 no measure of human impact—such as the Human Footprint—has previously been explicitly  
70 incorporated into methods to value and prioritise the conservation of global vertebrate PD. Here, we

71 present two new metrics combining human encroachment (to measure vulnerability), and range size  
72 (to measure irreplaceability), to identify high value regions and high priority species for conserving  
73 reptile PD. For comparison, we also calculate these metrics at the global scale for all tetrapod clades.

## 74 Methods

### 75 Data

76 We used updated reptile distribution polygons from the Global Assessment of Reptile Distributions  
77 (GARD)<sup>21</sup>. We used published phylogenies for lepidosaurs (lizards, snakes and the tuatara)<sup>34</sup>,  
78 crocodilians<sup>35</sup> and turtles<sup>36</sup>. The crocodilian and turtle phylogenies used were single, consensus, fully-  
79 resolved phylogenies. To capture phylogenetic uncertainty around the taxonomically imputed  
80 lepidosaur phylogenies, we randomly sampled 100 fully-resolved phylogenies from a distribution of  
81 10,000 trees<sup>34</sup> and used each phylogeny in our analyses to generate median values of PD and PD-  
82 based metrics for each grid cell using a Mollweide equal area projection at 96.5 x 96.5 km grid cell  
83 resolution<sup>21</sup>. We matched the species in each phylogeny to the distribution data using the taxonomy  
84 from the July 2018 version of the Reptile Database<sup>18</sup>. For our spatial analyses we included only species  
85 with both phylogenetic and distribution data (9,862 species or 91% of total reptilian diversity;  
86 Supplementary Table 1).

87 We extracted a random sample of 100 phylogenetic trees from published phylogenies for  
88 amphibians<sup>37</sup>, birds<sup>13</sup> and mammals<sup>38</sup> and spatial data, as polygon shapefiles, for amphibians and  
89 mammals from IUCN<sup>27</sup> and for birds from BirdLife International<sup>39</sup>. These distribution data were subset  
90 to contain only native and resident or breeding ranges. As with reptiles, for our spatial analyses we  
91 included only species with both phylogenetic and distribution data (5,786 amphibians (75.5% of  
92 species); 9,274 birds (84.5%); 4,386 mammals (77%) - ~84% of all tetrapods, including reptiles;  
93 Supplementary Table 1) and calculated median values of PD and PD-based metrics for each grid cell.

94 We used the 2009 Human Footprint index (HF)<sup>30</sup>—the most up-to-date HF dataset—to designate  
95 spatial patterns of human pressure. The HF index evaluates each grid cell based on the intensity of  
96 eight measures of human pressure (built environments, crop land, pasture land, human population  
97 density, night-time lights, railways, roads, navigable waterways), weighted according to estimates of  
98 their relative levels of human pressure<sup>30,31</sup>, and assigns an HF value between 0 (lowest human

99 pressure) and 50 (greatest human pressure) to each cell<sup>30</sup>. We resampled the HF data from its original  
100 1 x 1 km resolution to our 96.5 x 96.5 km grid.

101

## 102 Spatial value metric for conserving PD

103 As small range size is linked to elevated extinction risk<sup>29,40</sup>, if small-ranged reptiles are clumped  
104 together on the tree of life, with no shared branches also subtended by a wide-ranging species, a  
105 disproportionately large amount of PD may be at risk of extinction. To examine whether small range  
106 size is phylogenetically conserved in this manner, we calculated Pagel's lambda<sup>41</sup> for crocodylians,  
107 turtles, and lepidosaurs separately and—within lepidosaurs—for lizards, amphisbaenians, and the  
108 tuatara (hereafter collectively 'lizards') and for snakes independently, to remove the biased caused by  
109 large range sizes of snakes from the analysis of lizard distributions<sup>21</sup>. Pagel's lambda provides an  
110 estimate of how phylogenetically conserved a trait is across a phylogeny, with scores close to 1  
111 indicating a trait is extremely clumped on the phylogeny, whereas scores close to 0 indicate a trait to  
112 be randomly dispersed throughout the phylogeny<sup>41</sup>.

113 To map global patterns of reptilian PD, for each grid cell occupied by at least one species, we summed  
114 the lengths of all branches between root and tips for each species in the grid cell. As the branch  
115 lengths are time-calibrated, the resulting values represent the PD, as units of time, present in each  
116 grid cell. To account for the internal branches connecting crocodylians, turtles and lepidosaurs when  
117 mapping PD for all reptiles, we used published divergence estimates between each clade pair<sup>42</sup>.

118 We summed the branch lengths of the turtle and crocodylian phylogenies, and combined these with  
119 the additional inferred PD and the median summed branch lengths from the 100 lepidosaur  
120 phylogenies to estimate total global reptilian PD. Though crocodylians were included in analyses of all  
121 reptiles, we do not report their individual results because they comprise of only 25 species<sup>18</sup>.

122 We explored the relationship between PD and richness for each reptile group using Pearson's  
123 correlation corrected for spatial autocorrelation in the R package 'Spatialpack'<sup>43,44</sup>, with conservative  
124 Bonferroni correction for multiple testing. To identify global variation in the relationship between PD  
125 and richness, we calculated the residuals from a linear regression of richness against PD for all grid  
126 cells. We consider grid cells harbouring more PD than expected for the observed richness to  
127 represent regions of disproportionately phylogenetically diverse species compositions.

128 For later comparison with our own PD-based spatial metric, we calculated three additional metrics:  
129 the species-based metric Weighted Endemism (WE), which provides a measure of range-size-  
130 weighted species richness<sup>12,21</sup>, and two PD-based extensions of Weighted Endemism: Evolutionary  
131 Distinctness Rarity (EDR)<sup>13</sup> and Phylogenetic Endemism (PE)<sup>12</sup> (Supplementary Table 2).

132 A key difference between the two PD-based metrics, Evolutionary Distinctness Rarity and  
133 Phylogenetic Endemism, is in their treatment of species ranges: Evolutionary Distinctness Rarity treats  
134 all species ranges as spatially independent whereas Phylogenetic Endemism accounts for the spatial  
135 overlap of species. We suggest that Evolutionary Distinctness Rarity and Phylogenetic Endemism  
136 therefore better represent the potential loss due to differing drivers. Evolutionary Distinctness Rarity  
137 represents the amount of Evolutionary Distinctiveness imperilled by *species*-specific threats (e.g.  
138 targeted hunting); the losses are species focused because only range size (and not range overlap with  
139 other species) is accounted for. In contrast, Phylogenetic Endemism represents the amount of  
140 phylogenetic diversity attributed to a particular unit of *space*, reflecting the impact of landscape-level  
141 threats (e.g. habitat loss); having additional descendent species in the same size region makes no  
142 difference to extinction risk of phylogenetic branches because loss of the region would impact all  
143 those species together. As most threats to tetrapod species are present at the landscape-level (e.g.  
144 agriculture, logging and livestock production)<sup>45-47</sup>, we hereafter report and develop analyses based on  
145 the Phylogenetic Endemism metric.

146

147 To assess the overlap between regions of high Phylogenetic Endemism and high human pressure, we  
148 identified the grid cells in the top 10% of all grid cells for reptilian Phylogenetic Endemism (hereafter  
149 “high value grid cells”) and calculated the proportion of the high value grid cells that are also deemed  
150 to be under ‘high’ or ‘very high’ human pressure (Human Footprint  $\geq 6$ )<sup>30</sup>. As Human Footprint value  
151 of 4 equates to the human pressure of pasture lands<sup>48,49</sup>, ours is a conservative estimate of intense  
152 human pressure<sup>30</sup>. We randomised the distribution of grid cells under high or very high human  
153 pressure across all terrestrial cells and recalculated the proportion of high value grid cells now  
154 considered to be under high or very high human pressure. We repeated this randomisation 1,000  
155 times to generate a distribution of randomised scores for comparison with the observed proportion  
156 of overlap.

157 Whilst Phylogenetic Endemism incorporates the intrinsic threat of small range size into the calculation  
158 of grid cells for conservation of unique evolutionary history, it does not measure the myriad extrinsic  
159 threats present. We therefore incorporated the Human Footprint (HF) index<sup>30,31</sup> as a measure of  
160 vulnerability.

161 To calculate an adjusted range size value for each species in relation to HF we first linearly scored  
162 each terrestrial grid cell between 0 and 1 according to which of the five approximately equally  
163 distributed classes of HF it belonged: HF-adjusted range size of 1 = ‘no pressure’ (HF = 0), the entire  
164 grid cell is retained; 0.8 = ‘low pressure’ (HF = 1-2); 0.6 = ‘moderate pressure’ (HF = 3-5); 0.4 = ‘high  
165 pressure’ (HF = 6-11); 0.2 = ‘very high pressure’ (HF = 12-50)<sup>30</sup>. A ‘very high pressure’ grid cell is  
166 therefore equivalent to 0.2 of a complete grid cell, to reflect the high human pressure and therefore  
167 likely greatly reduced remaining suitable habitat within that cell for species to persist. Though the  
168 true proportion of remaining suitable habitat will differ across grid cells of equal Human Footprint and  
169 will also be species-specific, our scoring of grid cells based on Human Footprint provides a relative  
170 scale representing human pressure under the assumption that increased human pressure equates to  
171 less remaining suitable habitat. The new “HF-adjusted range size” of a species is given by the sum of



172 HF-adjusted grid cell size for all cells across which a species is distributed. It can be thought of as an  
173 effective range size, which will be much smaller than the true range if large parts of it coincide with  
174 high levels of human pressure. Previous analyses have used fine-scale environmental data to estimate  
175 range loss across species under scenarios of change<sup>50</sup>, and combined these with phylogenetic data on  
176 a regional scale for a relatively small clade<sup>51</sup>. However, such fine-scale habitat association and  
177 environmental requirement data are lacking for the majority of reptiles and preclude such an analysis  
178 at this time.

179 We used these HF-adjusted range sizes to calculate a new spatial PD metric, derived from PE, which  
180 we term Human Impacted Phylogenetic Endemism (HIPE). This approach apportions the PD of each  
181 branch of the phylogeny according to each grid cell's contribution to the total adjusted range of the  
182 species (Supplementary Table 2). When a branch is found either in one grid cell or in multiple grid  
183 cells of the same HF-adjusted grid cell size, HIPE is equivalent to Phylogenetic Endemism in  
184 apportioning PD. However, when a branch occurs in grid cells of variable human impacts, PD is  
185 apportioned by the relative contribution of the Human Footprint-adjusted grid cells, so that those  
186 with lower human impact (higher HF-adjusted grid cell size) receive a greater proportion of PD to  
187 reflect their higher present value. Consequently, branches which are entirely distributed across grid  
188 cells of high human impact contribute a greater proportion of PD to highly impacted grid cells than  
189 branches which also occur in grid cells under low human impact.

190 Consider a grid cell under high human impact (HF-adjusted range size = 0.2) where only two branches  
191 are present, both comprising 10 MY of PD. Both branches also occur in one other grid cell, branch A in  
192 a low impact grid cell with a HF-adjusted range size of 1 (for a total HF-adjusted range of 1.2 grid cells)  
193 and branch B in a high impact grid cell with a HF-adjusted range size of 0.2 (total HF-adjusted range of  
194 0.4 grid cells). Under traditional Phylogenetic Endemism, the grid cell receives 50% of the PD from  
195 each branch (5 MY) as it comprises 50% of the total distribution of the branch (one of two grid cells).  
196 Under HIPE, however, branch A would apportion only 1/6th (1.667 MY) of its PD to the grid cell as it

197 comprises only 1/6th of the total HF-adjusted range (0.2 of total 1.2 range), with the remaining 5/6th  
198 of the PD being apportioned to the grid cell with a HF-adjusted range size of 1. Conversely, as branch  
199 B occurs only in two grid cells of HF-adjusted range size 0.2, the grid cell comprises 50% of the HF-  
200 adjusted range of the species (0.2 of total 0.4 range) and is apportioned 50% of the PD of the branch  
201 (5 MY) (Supplementary Table 2; Supplementary Figure 1).

202 HIPE increases the relative importance of grid cells under low human impact as well capturing cells  
203 with high endemic PD. It is therefore important for conservation planning to highlight which of the  
204 high value regions (based on HIPE) are driven by endemic PD in areas of high vs. low human impact,  
205 as the two extremes are likely to require different conservation action. We partitioned global patterns  
206 of HIPE by human impact, highlighting regions of high HIPE and high human impact ( $HF \geq 6$ ) and  
207 regions of high HIPE and low human impact ( $HF < 3$ ).

208 We mapped HIPE for all reptile groups individually and for all reptiles combined. To determine the  
209 regions where reptiles provide the greatest contributions to global patterns of tetrapod HIPE, we also  
210 calculated HIPE for mammals, birds, amphibians and for tetrapods as a whole. We then calculated the  
211 proportions of observed HIPE for all tetrapods that were contributed by each tetrapod clade. We  
212 present HIPE scores in  $MY/km^2$ , where the adjusted range size represents the area across which the  
213 scores are divided (e.g. a  $96.5 \times 96.5$  km grid cell with a HF-adjusted grid cell size of 0.2 is considered  
214 to comprise 1/5<sup>th</sup> of the area of an entire grid cell).

215 We ran spatially-corrected correlations between HIPE, Phylogenetic Endemism and Evolutionary  
216 Distinctness Rarity to test the extent to which these measures capture the same global patterns. We  
217 also ran a spatially-corrected correlations test for relationships between global HIPE patterns among  
218 reptile groups and between reptiles and other tetrapods, all with Bonferroni correction for multiple  
219 testing.

220

## 221 Species prioritisation metric for conserving PD

222 We estimated the total PD of reptiles by summing the branch lengths of the crocodylian and turtle  
223 phylogenies and adding these to the summed branch lengths for each of the 100 lepidosaur  
224 phylogenies to generate a distribution of 100 total reptilian PD values. We compared this distribution  
225 with that for other tetrapod classes, which we generated by summing the branch lengths of the 100  
226 random phylogenies for amphibians, birds and mammals. We compared the distributions of PD scores  
227 using ANOVA and applied Tukey's HSD test to identify pairwise differences between tetrapod classes.  
228 The branch lengths were summed for all phylogenies prior to the removal of species with no spatial  
229 data to limit the impact of differing availability of spatial data across the different classes.

230 To identify species that should be prioritised to preserve unique evolutionary history, we devised a  
231 new metric built around the main component common to both PE and EDR: terminal branch length  
232 (TBL). Terminal branches are those which connect the species (tips) to the internal branches of the  
233 phylogeny and are the only component of a phylogeny unique to each species. The length of these  
234 terminal branches represents the divergence time (in millions of years for time-calibrated  
235 phylogenies) between a species and their closest relatives.

236 We defined Terminal Endemism (TE) as the terminal branch length of a species multiplied by 1/the  
237 number of grid cells occupied by the species. If a species is found in only one grid cell then its loss  
238 from that grid cell would result in the loss of its entire terminal branch. The TE of a species is implicitly  
239 calculated when calculating both Evolutionary Distinctness Rarity and Phylogenetic Endemism and  
240 represents the unique contribution of the species to the total for each metric. We posit that, as a  
241 species focused measure, TE circumvents the differences between Evolutionary Distinctness Rarity  
242 and Phylogenetic Endemism and retains the most essential component of each.

243 To incorporate HF, we developed a counterpart to TE, 'Human Impacted Terminal Endemism' (HITE).

244 This metric is given by the terminal branch length of a species divided by its Human Footprint-

245 adjusted range size (see above). For example, a species with a terminal branch length of 10 MY that is

246 found in two grid cells, with HF-adjusted grid cell sizes of 0.2 and 1 would receive a HITE score of  
247  $10 \cdot (1/(1+0.2)) = 8.34$ . Under standard Terminal Endemism the same species would receive a lower  
248 score of 5: ( $10 \cdot (1/2)$ ). HITE therefore increases in response to terminal branches occurring in grid  
249 cells under high human impact.

250 We calculated the terminal branch lengths, HF-adjusted range size and HITE for all tetrapods and  
251 ranked the species from each clade to identify the species with the highest HITE scores. We highlight  
252 tetrapod species which are either unassessed or listed as Data Deficient by the IUCN, but have a high  
253 HITE score. These are species that, due to their high irreplaceability and extremely restricted and  
254 human-impacted range, are priorities for conservation assessment. Finally, we compared HITE scores  
255 for tetrapods across IUCN Red List categories, using ANOVA and Tukey's HSD test, to determine the  
256 relationship between HITE scores, data deficiency, and extinction risk across reptiles and all tetrapods.

257 To estimate how much reptilian PD may be lost if all threatened species were to become extinct, we  
258 dropped all species listed in threatened categories on the IUCN Red List (i.e. Vulnerable, Endangered  
259 and Critically Endangered) from their respective phylogenies and calculated the reduction in total PD.  
260 For lepidosaurs we did this for all 100 phylogenies to generate a distribution of values. To determine  
261 whether this potential loss of PD was greater than if extinction risk was randomly distributed across  
262 the reptilian tree of life, we then selected 100 random sets of species corresponding to an equal  
263 number of species as those observed to be threatened and dropped them from their respective  
264 phylogenies. We then compared the distribution of potential PD loss from species observed to be  
265 threatened with the distribution generated from randomised extinction using a paired t-test.

266 As it is likely that a significant proportion of unassessed and Data Deficient species are also  
267 threatened with extinction<sup>52,53</sup>, these estimates of loss of PD are conservative. To explore how data  
268 deficiency affects potential losses of PD across data-poor regions of the tree of life, we selected a  
269 poorly-known squamate genus as a case study. We estimated the amount of PD lost under different  
270 scenarios of phylogenetic relationships and extinction risk for *Dibamus*, one of the least-known

271 reptilian genera (and the sister clade to all other squamates). First, we estimated the amount of PD  
272 represented by the *Dibamus* species included in the phylogeny despite lacking genetic data across our  
273 random selection of 100 lepidosaur phylogenies. Second, we estimated how much PD would be lost  
274 under three extinction scenarios for *Dibamus*: 1) only a single unassessed or Data Deficient species  
275 becomes extinct; 2) a random number and selection of unassessed or Data Deficient species become  
276 extinct; and 3) all unassessed and Data Deficient species become extinct.

## 277 Results

### 278 Spatial value metric for conserving PD

279 Range size is weakly phylogenetically conserved across lepidosaurs ( $\lambda = 0.373$ ,  $p \ll 0.0001$ ;  
280 Supplementary Figure 2), and in lizards and snakes independently (lizards:  $\lambda = 0.485$ ,  $p \ll 0.0001$ ;  
281 snakes:  $\lambda = 0.345$ ,  $p \ll 0.0001$ ). However, range size is not significantly conserved across turtles ( $\lambda =$   
282  $0.12$ ,  $p = 0.03$ ) or crocodylians ( $\lambda = 0.048$ ,  $p = 0.815$ ), following Bonferroni correction for multiple  
283 testing (adjusted p-value threshold = 0.01), likely due to the low species richness of both clades.

284 Reptilian PD is largely concentrated throughout the tropics (Figure 1, Supplementary Figure 3), and is  
285 strongly correlated with species richness on a global scale for all reptiles ( $r = 0.948$ , e.d.f. = 23.7,  $p \ll$   
286  $0.0001$ ), lizards ( $r = 0.920$ , e.d.f. = 21.1,  $p \ll 0.0001$ ), snakes ( $r = 0.899$ , e.d.f. = 24.4,  $p \ll 0.0001$ ) and  
287 turtles ( $r = 0.873$ , e.d.f. = 28.1,  $p \ll 0.0001$ ). Lizard PD is high across Southeast Asia, the Amazon basin  
288 and Australia (Figure 1a). Large concentrations of snake PD are found in Malaysia and Indonesia  
289 (Figure 1d), whereas the greatest concentrations of turtle PD are found across the Amazon Basin  
290 (Figure 1g), despite turtle richness peaking in the Ganges Delta.

291 The greatest levels of high lizard PD, compared with species richness (residuals of PD vs. richness), are  
292 in mainland Southeast Asia, whereas regions with the lowest levels of residual PD occur across  
293 Australia, where richness is highest (Figure 1b-c). The largest accumulations of snake PD for a given  
294 richness occur in mainland Southeast Asia, and the lowest coincide with the species-rich Amazon  
295 Basin and Atlantic coast of Brazil (Figure 1e-f). The greatest accumulations of turtle PD for a given  
296 richness occur across subtropical West and Central Africa and the Amazon Basin, with lowest  
297 accumulations occurring where species richness is highest: the Ganges Delta and Eastern USA (Figure  
298 1h-i).

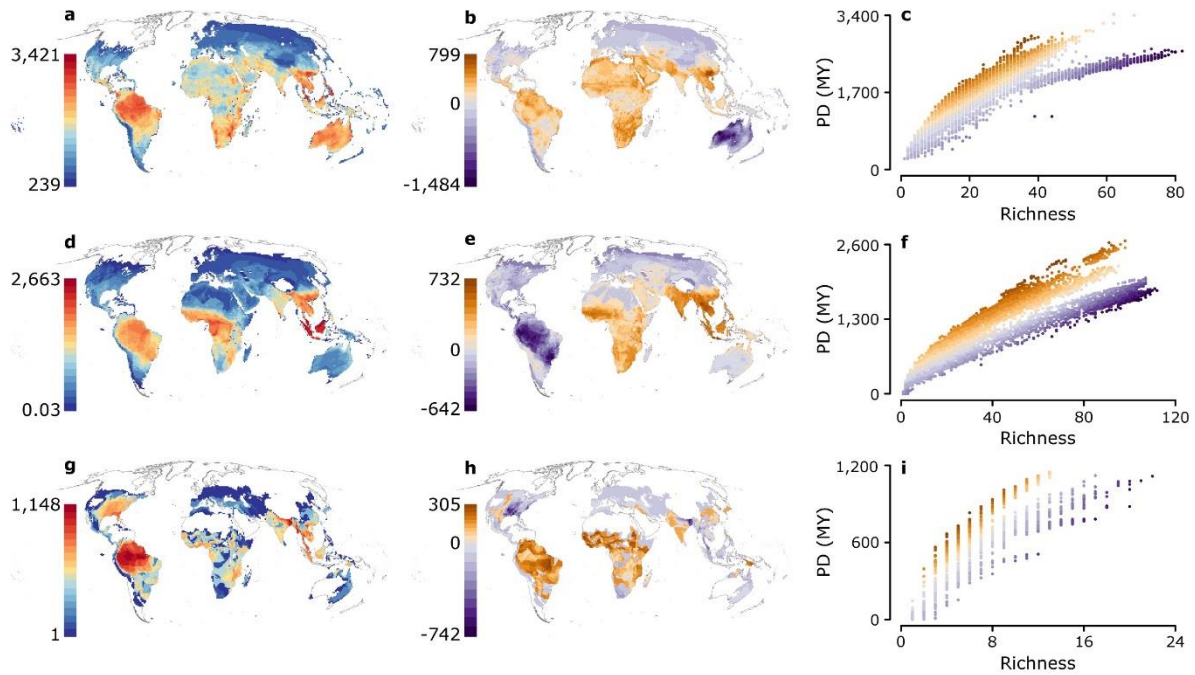

299

300 **Figure 1: Global patterns of reptilian phylogenetic diversity (PD).** Cumulative PD, in millions of years  
301 (MY) (left), Middle: residual PD per grid cell, in MY, (warm colours: more than expected given  
302 richness, cold colours: less than expected given richness), Right: the relationship between richness  
303 and PD across all grid cells for lizards (a-c), snakes (d-f), and turtles (g-i).

304

305 Phylogenetic Endemism (PE) and Evolutionary Distinctness Rarity (EDR) for reptiles are highly  
306 correlated at the global scale ( $r = 0.975$ , e.d.f. = 537,  $p \ll 0.0001$ ) and both are highly correlated with  
307 the non-phylogenetic measure of Weighted Endemism (WE; both  $r > 0.93$ ; Supplementary Figure 4).

308 Almost three-quarters (74%) of high-value grid cells of PE (i.e. top 10% ranking grid cells) are in  
309 regions of high or very high human pressure (Human Footprint  $\geq 6$ ), whereas just 5% of high PE grid  
310 cells coincide with regions of low or no human pressure (HF  $< 3$ ). The strong association of regions of  
311 high PE with those of high human impact is surprising, considering the two are, in theory,  
312 independent. Indeed, when we randomise human pressure across grid cells, less than half (49%) of  
313 high-value grid cells coincide with high or very high human pressure, and 20% coincide with regions of  
314 low or no human pressure. High reptilian PE coincides with very high human pressure (HF  $> 11$ ) across

315 the tropics—particularly in India, Caribbean islands, the Atlantic Coast of Brazil, and Southeast Asia—  
316 and the Mediterranean coast and areas of the Middle East (bold red regions, Figure 2a). Regions of  
317 high PE and very low human pressure (HF < 1) are largely restricted to the Amazon Basin and central  
318 Australia (bold blue regions, Figure 2a).  
319

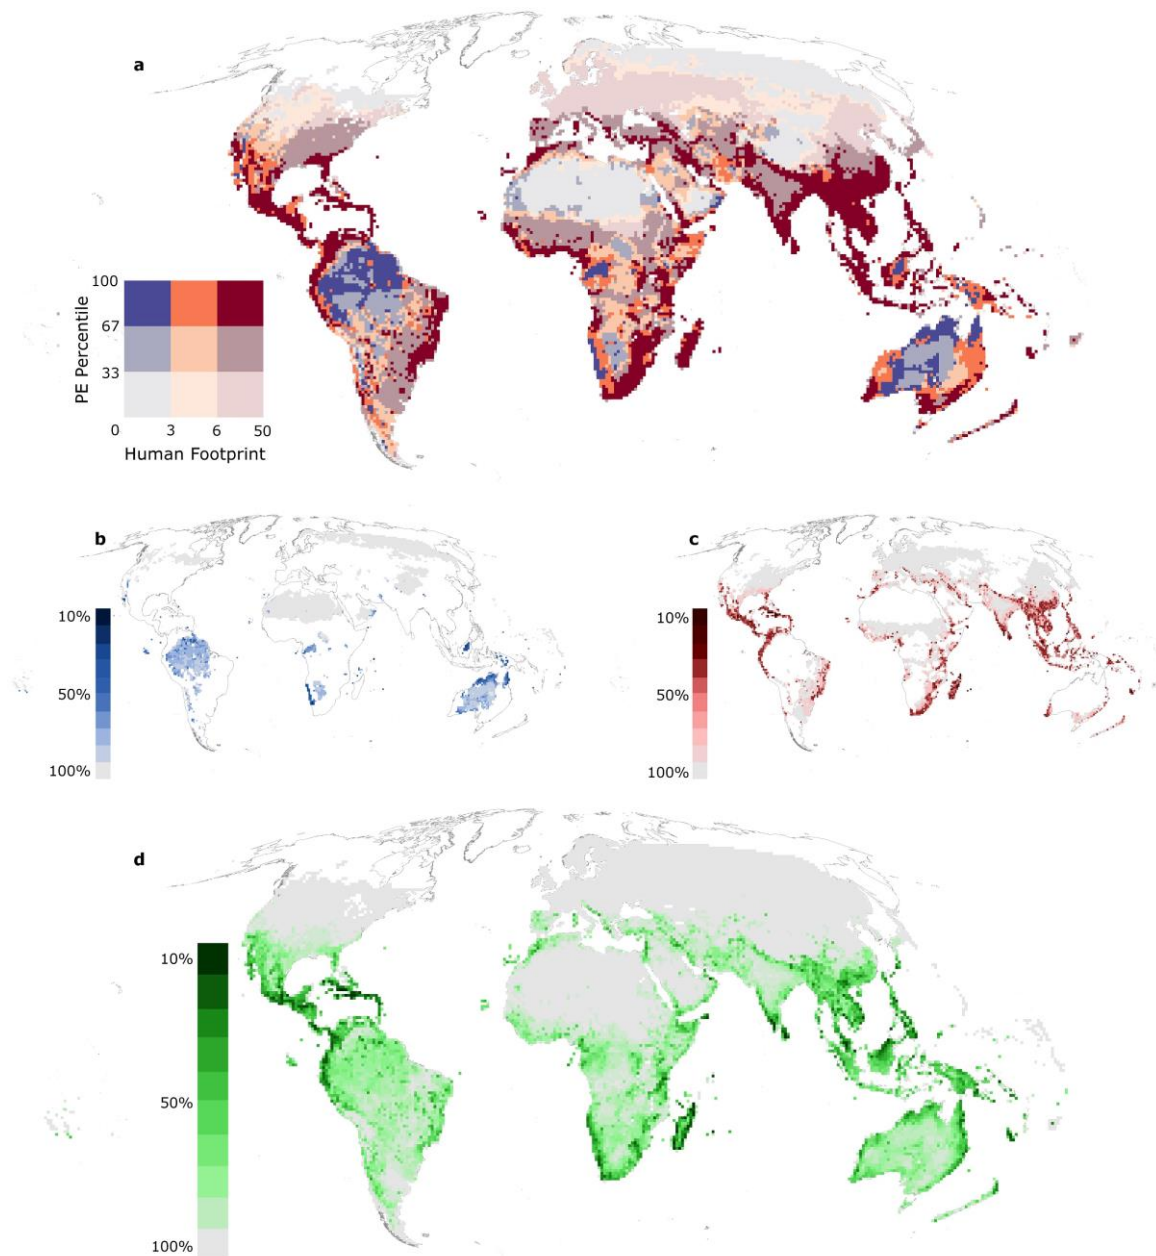

320

321 **Figure 2: Reptilian Phylogenetic Endemism (PE) and Human Footprint (HF).** a) The global relationship  
322 between reptilian PE and HF. The colour of the grid cell is determined by HF value and the intensity of



323 the colour by PE percentile. In panels b-d) grid cells are coloured by the cumulative amount of global  
324 HIPE captured; darkest blue (b), red (c), and green (d), indicate the highest-scoring grid cells which  
325 together capture 10% of global HIPE, whereas the lowest-scoring grid cells also capturing 10% of  
326 global HIPE are coloured light grey. Panel b) shows HIPE for low Human Footprint ( $< 3$ ) grid cells.  
327 Panel c) shows HIPE for high Human Footprint cells ( $\geq 6$ ), and panel d) shows overall global patterns of  
328 reptilian HIPE.

329

330 Human-Impacted Phylogenetic Endemism (HIPE), is correlated with standard PE for reptiles ( $r = 0.978$ ,  
331 e.d.f. = 448,  $p \ll 0.0001$ ; Supplementary Figure 4), despite individual grid cell values differing from PE  
332 by up to 1,500% (median = 21%). Highest HIPE value regions (grid cells comprising top 10% of global  
333 reptilian HIPE scores) which also coincide with high human pressure ( $HF \geq 6$ ) span Southeast Asia,  
334 Central America and the Caribbean, Madagascar and Sri Lanka (Figure 2b). Conversely, highest HIPE  
335 value regions which also coincide with low human pressure ( $HF < 3$ ) are restricted to the coast of  
336 Namibia, northern Australia and the highlands of Borneo (Figure 2c).

337 Globally, reptilian HIPE is greatest in Madagascar, Central America and the Caribbean, the Western  
338 Ghats of India, Sri Lanka, Socotra, peninsular Malaysia and northern Borneo (Figure 2d). Global  
339 patterns of lizard HIPE largely reflect those of all reptiles (Supplementary Figure 5), whereas those for  
340 snakes emphasise Central Africa and Southeast Asia (Supplementary Figure 5). High levels of turtle  
341 HIPE are concentrated in the Amazon Basin, Central America, southern USA, Southeast Asia, New  
342 Guinea, and northern Australia (Supplementary Figure 5).

343 Grid cells have much greater median and maximum HIPE scores for reptiles than for other tetrapod  
344 classes (median =  $9.1 \times 10^{-4}$  MY/km<sup>2</sup> vs amphibians =  $4.2 \times 10^{-4}$  MY/km<sup>2</sup>, birds =  $4.3 \times 10^{-4}$  MY/km<sup>2</sup>,  
345 mammals =  $3.6 \times 10^{-4}$  MY/km<sup>2</sup>; maximum = 0.33 MY/km<sup>2</sup> vs amphibians = 0.30 MY/km<sup>2</sup>, birds = 0.05  
346 MY/km<sup>2</sup>, mammals = 0.03 MY/km<sup>2</sup>). Reptiles contribute a median of 31.1% to tetrapod HIPE scores  
347 across all grid cells in which they are present, more than any other class (amphibians = 16.6%, birds =

348 29.7%, mammals = 18%; Supplementary Figure 6). The greatest reptilian contributions (>90% of  
349 tetrapod HIPE) occur across the Middle East and North Africa (Figure 3a). The lowest non-zero  
350 contributions of reptiles (<10%) occur across northern North America and Europe, the Andes and the  
351 Himalayas, where reptiles are scarce.

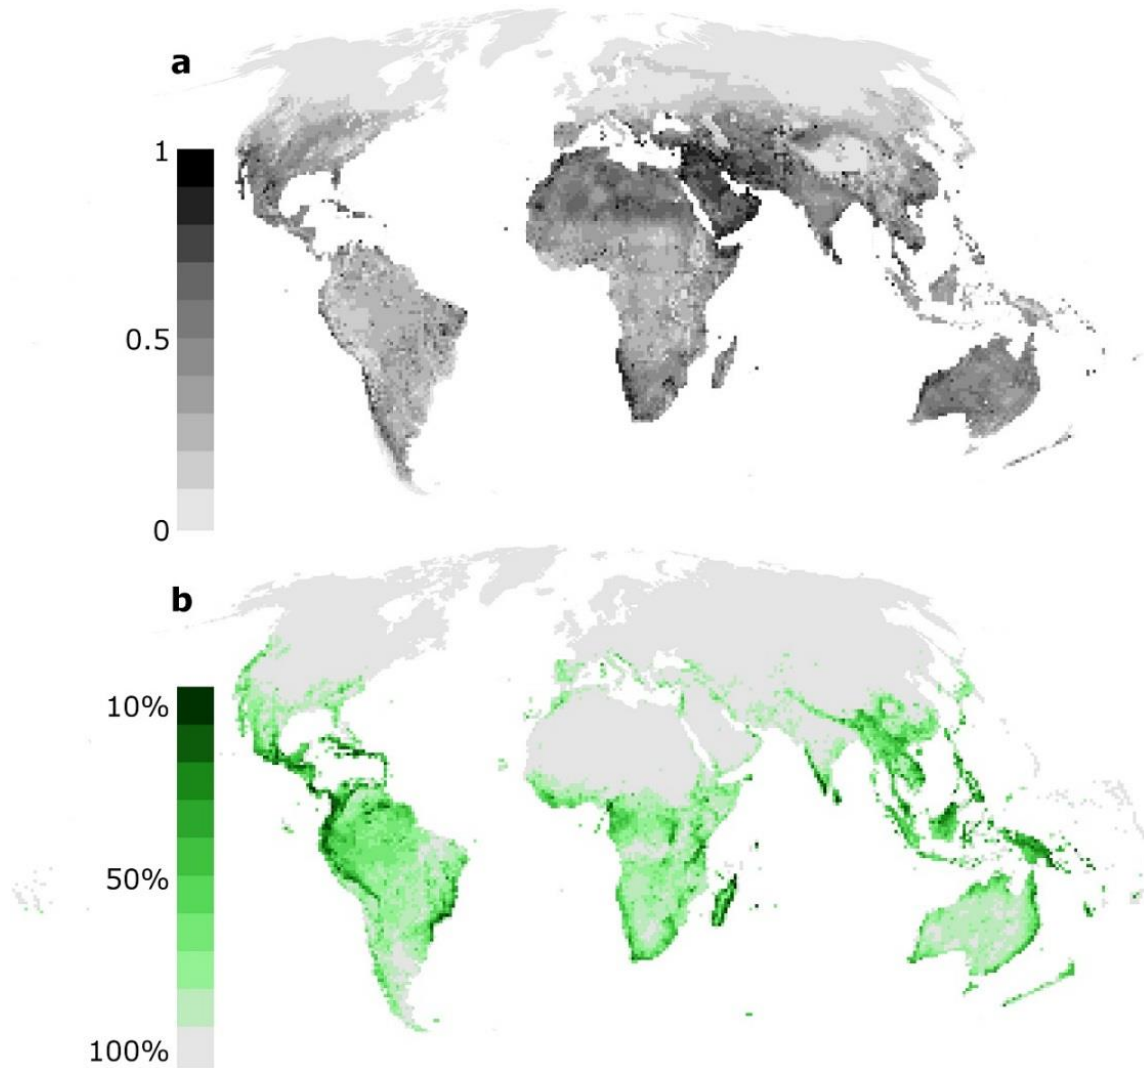

352  
353 **Figure 3: Global patterns of tetrapod HIPE and reptilian contributions.** The global patterns of a) the  
354 proportion of tetrapod HIPE contributed by reptiles, from 1 (100% of HIPE contributed by reptiles;  
355 black) to 0 (0% of HIPE contributed by reptiles; light grey); and b) tetrapod HIPE, where grid cells are  
356 coloured by the cumulative amount of global HIPE captured; darkest green cells comprise the highest-  
357 scoring grid cells which together capture 10% of global HIPE, whereas the lowest-scoring grid cells  
358 which together capture 10% of global HIPE are coloured light grey.

359

360 Reptilian HIPE is only moderately correlated with HIPE patterns for other tetrapod classes in each cell  
361 across the globe, and inter-correlations are moderate between all classes (Supplementary Figure 7).  
362 Turtle HIPE is consistently weakly correlated with that of other reptilian orders and tetrapod classes ( $r$   
363  $< 0.25$ , Supplementary Figure 7). Global patterns of tetrapod HIPE are broadly congruent with those  
364 for reptiles, but place further emphasis on the importance of the Atlantic coast of Brazil, the  
365 Caribbean, Central Africa and New Guinea (Figure 3b). The variation in patterns of clade-specific  
366 contributions to global tetrapod HIPE (Figure 3a, Supplementary Figure 6) further highlights the  
367 importance of including all tetrapod classes in analyses designed to represent the entire clade.

368

### 369 Species prioritisation metric for conserving PD

370 Globally, the 91% of reptiles with phylogenetic data comprise approximately 137 billion years of  
371 phylogenetic diversity (PD), significantly more than any other tetrapod class (adjusted p-values from  
372 Tukey Honest Significant Differences  $< 0.0001$ ; amphibians = 130 BY (93% of species), birds = 85 BY  
373 (74% of species), mammals = 47 BY (83.5% of species); Supplementary Table 2).

374 Turtles have the greatest median terminal branch length (TBL) of any tetrapod clade (14.1 MY),  
375 whereas lepidosaurs have the greatest maximum TBL (238.7 MY – *Sphenodon punctatus*). Under our  
376 new species-level metric, Human-Impacted Terminal Endemism (HITE), lepidosaurs have the second-  
377 highest median score ( $9.9 \times 10^{-5}$  MY/km<sup>2</sup>; lizards =  $1.7 \times 10^{-4}$  MY/km<sup>2</sup>, snakes =  $2.8 \times 10^{-5}$  MY/km<sup>2</sup>;  
378 Figure 4a). This is greater than both birds ( $3.0 \times 10^{-5}$  MY/km<sup>2</sup>) and mammals ( $8.5 \times 10^{-5}$  MY/km<sup>2</sup>), with  
379 only amphibians scoring higher (median =  $5.1 \times 10^{-4}$  MY/km<sup>2</sup>, maximum =  $6.3 \times 10^{-2}$  MY/km<sup>2</sup>; Figure  
380 4a).

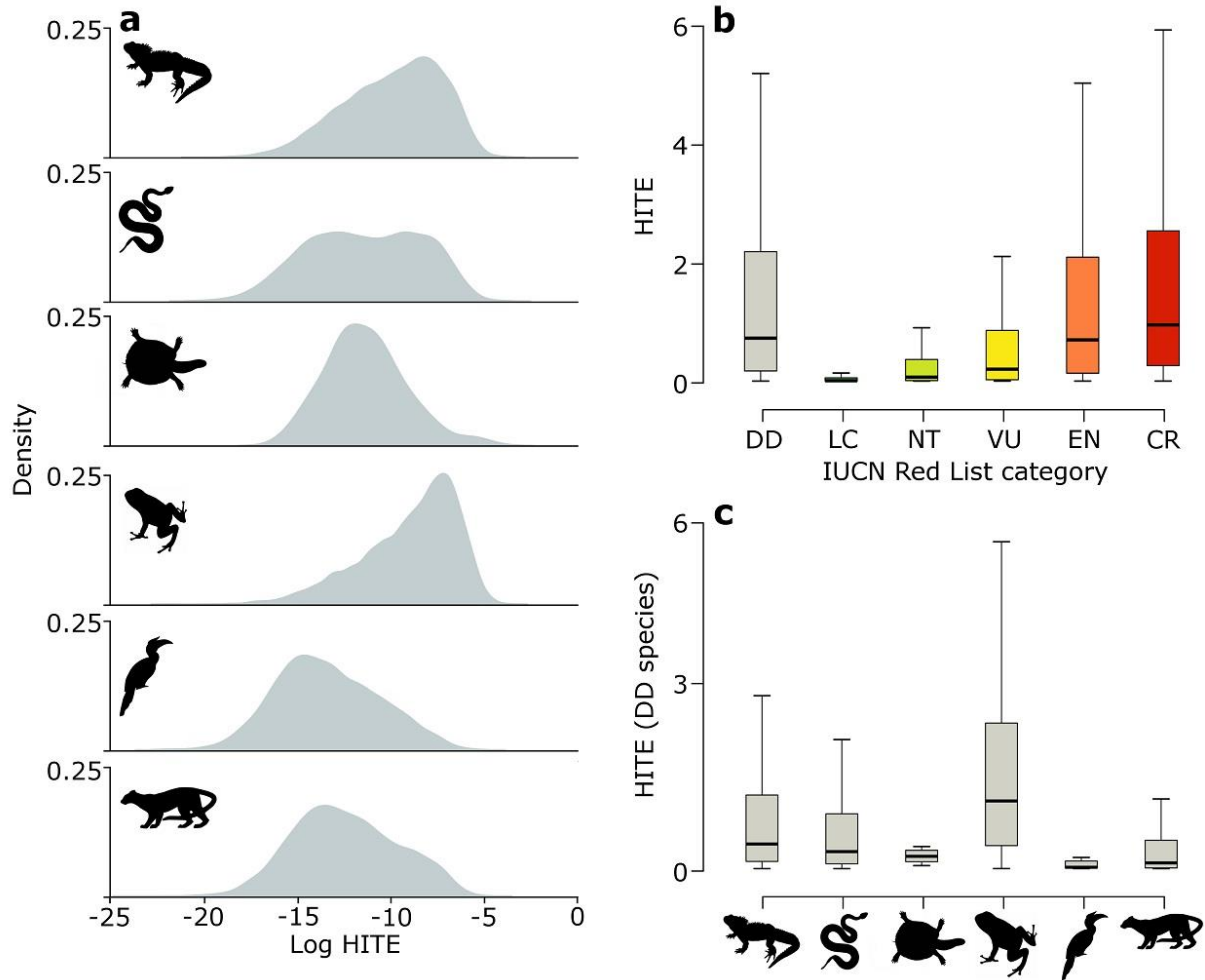

381

382 **Figure 4: Distributions of Human Impacted Terminal Endemism (HITE) for tetrapods. a) Density**

383 distributions of log-transformed HITE scores for tetrapods. Species with long terminal branches

384 occurring in very few grid cells under high human pressure score highly and fall on the right of the x-

385 axis, whereas species with short terminal branches and large ranges encompassing regions of low

386 human pressure fall on the left of the x-axis. Y-axis indicates density of species in each clade with a

387 given HITE value. b) Distribution of HITE scores (in  $10^{-3}$  MY/km<sup>2</sup>) across tetrapods for each IUCN Red

388 List category (excluding Extinct, Extinct in the Wild and unassessed species). c) Distribution of HITE

389 scores (in  $10^{-3}$  MY/km<sup>2</sup>) for Data Deficient (DD) tetrapod species for key tetrapod groups.

390

391 Data Deficient tetrapods tend to have longer terminal branches (median = 5.4 MY) than those listed

392 as Least Concern (4.3 MY), Near Threatened (4.3 MY) and Vulnerable (4.8 MY; adjusted p-values from

393 Tukey HSD test  $< 0.001$ ) and not significantly different from Endangered (5.2 MY) and Critically  
394 Endangered (5.5 MY) species (adjusted p-values  $> 0.05$ ). HITE scores are greater for Data Deficient  
395 tetrapods (median =  $7.2 \times 10^{-4}$  MY/km<sup>2</sup>) than those listed as Least Concern ( $6.3 \times 10^{-6}$  MY/km<sup>2</sup>), Near  
396 Threatened ( $6.7 \times 10^{-5}$  MY/km<sup>2</sup>) and Vulnerable ( $2.0 \times 10^{-4}$  MY/km<sup>2</sup>; adjusted p-values  $< 0.001$ ), and  
397 are comparable to those of Endangered ( $6.9 \times 10^{-4}$  MY/km<sup>2</sup>) and Critically Endangered species ( $9.5 \times$   
398  $10^{-4}$  MY/km<sup>2</sup>; adjusted p-values  $> 0.05$ ; Figure 4b).

399 Within Data Deficient species, amphibians have the highest HITE scores (median =  $1.5 \times 10^{-3}$  MY/km<sup>2</sup>),  
400 followed by lepidosaurs ( $4.7 \times 10^{-4}$  MY/km<sup>2</sup>; lizards =  $5.5 \times 10^{-4}$  MY/km<sup>2</sup>, snakes =  $3.8 \times 10^{-4}$  MY/km<sup>2</sup>;  
401 Figure 4c). Worryingly, four of the ten highest ranking lizards and eight of the top ten snakes are listed  
402 as Data Deficient by the IUCN Red List (ten highest-ranking HITE species for each clade:  
403 Supplementary Table 3).

404 If all reptiles currently listed as threatened by the IUCN Red List were to become extinct (1,196 spp.  
405 with phylogenetic data), we stand to lose more than 13.1 billion years of PD (mean; range = 12.3 –  
406 14.3), or around 10% of total reptile PD. This is 1.36 billion years more PD than if extinction risk was  
407 randomly distributed across the reptilian phylogeny (paired t-test;  $t = 20.32$ , d.f. = 99,  $p < 0.0001$ ).

408 Given the large proportion of Data Deficient and unassessed reptiles (~10% and ~34% of all species,  
409 respectively), and their potentially high extinction risk, such loss of PD may be much greater,  
410 especially where data deficiency for both extinction risk and phylogenetic relationships intersect.

411 For example, the lizard genus *Dibamus* is represented by 22 species in our study (of the 24 species  
412 recognised globally), 16 of which are either unassessed or listed as Data Deficient by the IUCN Red List  
413 (as of December 2018). Fifteen of these 22 species are included in the phylogeny despite having no  
414 genetic data available, and 12 are known only from their type locality<sup>54</sup>. The amount of PD  
415 represented by the 15 species without genetic data is highly uncertain, and ranges from 260 - 1,340  
416 MY across 100 phylogenies (median = 560 MY). Accordingly, estimates of the amount of PD loss due  
417 to extinction of unassessed or Data Deficient species range from 0.1 MY (a single species lost with the

418 shortest terminal branch length across 100 phylogenies – 0.00001% additional PD loss) to 1,010 MY  
419 (all 16 unassessed/Data Deficient species lost with maximum branch lengths from 100 phylogenies –  
420 7.8% additional PD loss), with a median loss of 230 MY (1.8% additional PD loss).

## 421 Discussion

422 Globally, reptiles comprise significantly more phylogenetic diversity (PD) than any other tetrapod  
423 class. The distribution of reptilian PD largely reflects global richness patterns<sup>21</sup>, though our analysis  
424 suggests that extremely high richness in snakes and lizards is achieved through shallow diversification  
425 within clades (Figure 1). Our results highlight a large overlap between regions of high human impact  
426 and irreplaceable reptilian PD, which is much greater than expected if the two were independent. We  
427 therefore incorporated Human Footprint data into our spatial and species-level analyses to capture its  
428 potential impact on globally significant concentrations of range-restricted PD. Our metrics represent  
429 the first integration of data on environmental pressure affecting terrestrial vertebrates into global  
430 prioritisations of imperilled PD.

431 Reptiles have the highest scores of our spatial metric, Human Impacted Phylogenetic Endemism  
432 (HIPE), meaning they are faring worse than amphibians, birds and mammals, and contribute the  
433 highest levels of imperilled PD per grid cell. Reptilian contributions to global patterns of tetrapod HIPE  
434 are greatest in arid and semi-arid regions, particularly in the Middle East and Southern, North and the  
435 Horn of Africa (Figure 2d, Figure 3a)—areas often overlooked in global prioritisations of terrestrial  
436 conservation importance for other tetrapod classes<sup>7,13,14,22,25</sup>. Thus, the inclusion of reptiles in global  
437 analyses of this kind is crucial to improve accuracy when attempting to value terrestrial vertebrate  
438 diversity for conservation at national, regional and global scales.

439 Global patterns of tetrapod HIPE emphasise the importance of regions where large amounts of PD are  
440 wholly restricted to areas under high human impact; particularly Central America and the Caribbean,  
441 Madagascar, the Western Ghats and large swathes of Southeast Asia (Figure 2c), and echo general  
442 patterns of Biodiversity Hotspots<sup>55</sup>. These grid cells represent areas of high urgency for conservation  
443 of global PD. As HIPE alters the effective range of each species under the assumption that a greater  
444 proportion of the range persists in grid cells under lower human impact, it also increases the relative  
445 importance of these grid cells. We therefore also highlight areas of the Amazon Basin, the Namib

446 coast of Africa, Central Africa, Northern Australia—regions not captured by existing Biodiversity  
447 Hotspots—and the highlands of Borneo (Figure 2b) as long-term conservation priorities, where  
448 activities to limit future human impact are more pertinent.

449 At the species level, reptiles embody more unique evolutionary history than amphibians, birds or  
450 mammals. Turtles tend to have particularly long terminal branches, indicating that each turtle species  
451 tends to represent large amounts of unique evolutionary history. It is troubling to note that, across  
452 tetrapods, Data Deficient and threatened species also generally comprise more unique evolutionary  
453 history than non-threatened species. Our species-level metric, Human Impacted Terminal Endemism  
454 (HITE), prioritises species with long terminal branches restricted to small ranges under high human  
455 impact. Large numbers of small-ranged amphibians and lizards tend to be on long terminal branches  
456 and occur in areas of high human impact, and our metric highlights these groups as of major  
457 conservation concern.

458 Many of the highest-ranking HITE tetrapods which have also been classified by the IUCN Red List as  
459 Endangered or Critically Endangered are also recognised as priority Evolutionarily Distinct and  
460 Globally Endangered (EDGE) species<sup>56</sup>. However, as HITE does not consider IUCN Red List extinction  
461 risk data, and uses only phylogeny, range size and Human Footprint, we also identify species of  
462 conservation importance which are currently unassessed or listed as Data Deficient by the IUCN.  
463 Indeed, we found that Data Deficient tetrapods tend to have HITE scores comparable to those of  
464 species listed as Endangered or Critically Endangered. This pattern is particularly pronounced in  
465 lizards, snakes and amphibians, where considerably greater proportions of the highest-ranking HITE  
466 species for these groups are Data Deficient than either birds or mammals. This suggests that many of  
467 the poorly-known amphibians and reptiles are likely to be highly evolutionarily distinct and restricted  
468 to regions of intense human pressure. Although such prevalence of high-ranking Data Deficient HITE  
469 species is likely driven by higher proportions of data deficiency in amphibians (22%) and reptiles (15%)



470 compared with birds (0.5%) and mammals (14%)<sup>27</sup>, it also highlights the urgent need to assess the  
471 extinction risk facing these species in areas of high human impact.

472 Our case study of the poorly-known lizard genus *Dibamus* underlines the amount of uncertainty we  
473 currently face when identifying conservation priorities and estimating impacts of species loss across  
474 the tree of life. Our estimation of potential loss of reptilian phylogenetic diversity in this clade varies  
475 across four orders of magnitude depending on our assumptions of uncertainty in both phylogeny and  
476 extinction risk. Although this is an extreme example, our lack of knowledge of extinction risk and  
477 phylogenetic relationships across the reptilian tree of life mean any estimations of potential loss of  
478 diversity may be significant underestimates.

479 It is likely that, without conservation action, we will face losses of billions of years of unique  
480 amphibian and reptilian evolutionary history worldwide. While greater research efforts are needed to  
481 elucidate the phylogenetic relationships, distribution and population status of poorly known reptiles  
482 and amphibians, current and future conservation efforts also need to focus on regions, lineages and  
483 species that hold or represent disproportionate amounts of imperilled PD.

## 484 References

- 485 1. Ceballos, G. *et al.* Accelerated modern human – induced species losses: entering the sixth  
486 mass extinction. *Sci. Adv.* **1**, 1–5 (2015).
- 487 2. Hoffmann, M. *et al.* The Impact of Conservation on the Status of the World ’ s Vertebrates.  
488 *Science* **330**, 1503–1509 (2010).
- 489 3. Mccarthy, D. P. *et al.* Financial Costs of Meeting Global Biodiversity Conservation Targets:  
490 Current Spending and Unmet Needs. *Science* **338**, 946–949 (2012).
- 491 4. Faith, D. P. Conservation evaluation and phylogenetic diversity. *Biol. Conserv.* **61**, 1–10 (1992).
- 492 5. Rosauer, D. F., Pollock, L. J., Linke, S. & Jetz, W. Phylogenetically informed spatial planning is  
493 required to conserve the mammalian tree of life. *Proc. R. Soc. B Biol. Sci.* **284**, 20170627  
494 (2017).
- 495 6. Thuiller, W. *et al.* Consequences of climate change on the tree of life in Europe. *Nature* **470**,  
496 531–534 (2011).
- 497 7. Pollock, L. J., Thuiller, W. & Jetz, W. Large conservation gains possible for global biodiversity  
498 facets. *Nature* **546**, 141–144 (2017).
- 499 8. Forest, F. *et al.* Preserving the evolutionary potential of floras in biodiversity hotspots. *Nature*  
500 **445**, 757–760 (2007).
- 501 9. Owen, N. R., Gumbs, R., Gray, C. L. & Faith, D. P. Global conservation of phylogenetic diversity  
502 captures more than just functional diversity. *Nat. Commun.* **10**, 859 (2019).
- 503 10. Isaac, N. J. B., Turvey, S. T., Collen, B., Waterman, C. & Baillie, J. E. M. Mammals on the EDGE:  
504 Conservation priorities based on threat and phylogeny. *PLoS One* **2**, e296 (2007).
- 505 11. Faith, D. P. Threatened species and the potential loss of phylogenetic diversity: Conservation  
506 scenarios based on estimated extinction probabilities and phylogenetic risk analysis. *Conserv.*

- 507 *Biol.* **22**, 1461–1470 (2008).
- 508 12. Rosauer, D., Laffan, S. W., Crisp, M. D., Donnellan, S. C. & Cook, L. G. Phylogenetic endemism:  
509 A new approach for identifying geographical concentrations of evolutionary history. *Mol. Ecol.*  
510 **18**, 4061–4072 (2009).
- 511 13. Jetz, W. *et al.* Global Distribution and Conservation of Evolutionary Distinctness in Birds. *Curr.*  
512 *Biol.* **24**, 919–930 (2014).
- 513 14. Rosauer, D. F. & Jetz, W. Phylogenetic endemism in terrestrial mammals. *Glob. Ecol. Biogeogr.*  
514 **24**, 168–179 (2015).
- 515 15. Davis, M., Faurby, S. & Svenning, J.-C. Mammal diversity will take millions of years to recover  
516 from the current biodiversity crisis. *Proc. Natl. Acad. Sci.* **115**, 11262–11267 (2018).
- 517 16. Daru, B. H. *et al.* Spatial overlaps between the global protected areas network and terrestrial  
518 hotspots of evolutionary diversity. *Glob. Ecol. Biogeogr.* **28**, 757–766 (2019).
- 519 17. Meiri, S. & Chapple, D. G. Biases in the current knowledge of threat status in lizards, and  
520 bridging the ‘assessment gap’. *Biol. Conserv.* **204**, 6–15 (2016).
- 521 18. Uetz, P., Freed, P. & Hosek, J. The Reptile Database. (2018). Available at: [http://www.reptile-](http://www.reptile-database.org)  
522 [database.org](http://www.reptile-database.org). (Accessed: 15th April 2016)
- 523 19. Böhm, M. *et al.* The conservation status of the world’s reptiles. *Biol. Conserv.* **157**, 372–385  
524 (2013).
- 525 20. Saha, A. *et al.* Tracking Global Population Trends: Population Time-Series Data and a Living  
526 Planet Index for Reptiles. *J. Herpetol.* **52**, 259–268 (2018).
- 527 21. Roll, U. *et al.* The global distribution of tetrapods reveals a need for targeted reptile  
528 conservation. *Nat. Ecol. Evol.* **1**, 1677–1682 (2017).
- 529 22. Safi, K., Armour-Marshall, K., Baillie, J. E. M. & Isaac, N. J. B. Global Patterns of Evolutionary

- 530 Distinct and Globally Endangered Amphibians and Mammals. *PLoS One* **8**, (2013).
- 531 23. Faith, D. P. Phylogenetic diversity, functional trait diversity and extinction: avoiding tipping  
532 points and worst-case losses. *Philos. Trans. R. Soc. Lond. B. Biol. Sci.* **370**, 200140011 (2015).
- 533 24. Margules, C. R. & Pressey, R. L. Systematic conservation planning. *Nature* **405**, 243–253 (2000).
- 534 25. Brooks, T. M. *et al.* Global Biodiversity Conservation Priorities. *Science* **313**, 58–61 (2006).
- 535 26. Tapley, B. *et al.* The disparity between species description and conservation assessment: A  
536 case study in taxa with high rates of species discovery. *Biol. Conserv.* **220**, 209–214 (2018).
- 537 27. IUCN. IUCN Red List of Threatened Species. Version 2018-3. (2018). Available at:  
538 [www.iucnredlist.org](http://www.iucnredlist.org).
- 539 28. Böhm, M. *et al.* Hot and bothered: Using trait-based approaches to assess climate change  
540 vulnerability in reptiles. *Biol. Conserv.* **204**, 32–41 (2016).
- 541 29. Böhm, M. *et al.* Correlates of extinction risk in squamate reptiles: The relative importance of  
542 biology, geography, threat and range size. *Glob. Ecol. Biogeogr.* **25**, 391–405 (2016).
- 543 30. Venter, O. *et al.* Sixteen years of change in the global terrestrial human footprint and  
544 implications for biodiversity conservation. *Nat. Commun.* **7**, 12558 (2016).
- 545 31. Sanderson, E. W. *et al.* The Human Footprint and the Last of the Wild. *Bioscience* **52**, 891–904  
546 (2002).
- 547 32. Di Marco, M. & Santini, L. Human pressures predict species' geographic range size better than  
548 biological traits. *Glob. Chang. Biol.* **21**, 2169–2178 (2015).
- 549 33. Safi, K. & Pettorelli, N. Phylogenetic, spatial and environmental components of extinction risk  
550 in carnivores. *Glob. Ecol. Biogeogr.* **19**, 352–362 (2010).
- 551 34. Tonini, J. F. R., Beard, K. H., Ferreira, R. B., Jetz, W. & Pyron, R. A. Fully-sampled phylogenies of

- 552 squamates reveal evolutionary patterns in threat status. *Biol. Conserv.* **204**, 23–31 (2016).
- 553 35. Oaks, J. R. A Time-Calibrated Species Tree of Crocodylia Reveals a Recent Radiation of the True  
554 Crocodiles. *Evolution* **65**, 3285–3297 (2011).
- 555 36. Pereira, A. G., Sterli, J., Moreira, F. R. R. & Schrago, C. G. Multilocus phylogeny and statistical  
556 biogeography clarify the evolutionary history of major lineages of turtles. *Mol. Phylogenet.*  
557 *Evol.* **113**, 59–66 (2017).
- 558 37. Jetz, W. & Pyron, R. A. The interplay of past diversification and evolutionary isolation with  
559 present imperilment across the amphibian tree of life. *Nat. Ecol. Evol.* **2**, 850–858 (2018).
- 560 38. Kuhn, T. S., Mooers, A. & Thomas, G. H. A simple polytomy resolver for dated phylogenies.  
561 *Methods Ecol. Evol.* **2**, 427–436 (2011).
- 562 39. BirdLife International and Handbook of the Birds of the World. *Bird species distribution maps*  
563 *of the world. Version 7.0.* (2017). Available at: <http://datazone.birdlife.org/species/requestdis>.
- 564 40. Cardillo, M. *et al.* Multiple Causes of High Extinction Risk in Large Mammal Species. *Science*  
565 **309**, 1239–1241 (2005).
- 566 41. Pagel, M. Inferring the historical patterns of biological evolution. *Nature* **401**, 877–884 (1999).
- 567 42. Chiari, Y., Cahais, V., Galtier, N. & Delsuc, F. Phylogenomic analyses support the position of  
568 turtles as the sister group of birds and crocodiles (Archosauria). *BMC Biol* **10**, 65 (2012).
- 569 43. Osorio, F. & Vallejos, R. SpatialPack: Package for analysis of spatial data (R package version 0.3,  
570 2018). (2018).
- 571 44. Dutilleul, P., Clifford, P., Richardson, S. & Hemon, D. Modifying the t Test for Assessing the  
572 Correlation Between Two Spatial Processes. *Biometrics* **49**, 305–314 (1993).
- 573 45. Schipper, J. *et al.* The Status of the World’s Land and Marine Mammals: Diversity, Threat, and  
574 Knowledge. *Science* **322**, 225–230 (2008).

- 575 46. Maxwell, S. L., Fuller, R. A., Brooks, T. M. & Watson, J. E. Biodiversity: The ravages of guns, nets  
576 and bulldozers. *Nature* **536**, 143–145 (2016).
- 577 47. Ripple, W. J. *et al.* Extinction risk is most acute for the world’s largest and smallest vertebrates.  
578 *Proc. Natl. Acad. Sci.* **114**, 10678–10683 (2017).
- 579 48. Watson, J. E. M. *et al.* Persistent Disparities between Recent Rates of Habitat Conversion and  
580 Protection and Implications for Future Global Conservation Targets. *Conserv. Lett.* **9**, 413–421  
581 (2016).
- 582 49. Jones, K. R. *et al.* One-third of global protected land is under intense human pressure. *Science*  
583 **360**, 788–791 (2018).
- 584 50. Powers, R. P. & Jetz, W. Global habitat loss and extinction risk of terrestrial vertebrates under  
585 future land-use-change scenarios. *Nat. Clim. Chang.* **9**, 323–329 (2019).
- 586 51. González-Orozco, C. E. *et al.* Phylogenetic approaches reveal biodiversity threats under climate  
587 change. *Nat. Clim. Chang.* **6**, 1110 (2016).
- 588 52. Bland, L. M. & Böhm, M. Overcoming data deficiency in reptiles. *Biol. Conserv.* **204**, 16–22  
589 (2016).
- 590 53. Howard, S. D. & Bickford, D. P. Amphibians over the edge: silent extinction risk of Data  
591 Deficient species. *Divers. Distrib.* **20**, 837–846 (2014).
- 592 54. Meiri, S. *et al.* Extinct, obscure or imaginary: The lizard species with the smallest ranges.  
593 *Divers. Distrib.* **24**, 262–273 (2018).
- 594 55. Mittermeier, R. A. *et al.* *Hotspots Revisited*. (CEMEX, 2004).
- 595 56. Gumbs, R., Gray, C. L., Wearn, O. R. & Owen, N. R. Tetrapods on the EDGE: Overcoming data  
596 limitations to identify phylogenetic conservation priorities. *PLoS One* **13**, e0194680 (2018).
- 597

## 598 Acknowledgements

599 J.R. was funded by an Individual Research Fellowship from the Natural Environment Research  
600 Council (NERC) (NE/L011611/1). This study is a contribution to Imperial College's Grand Challenges  
601 in Ecosystems and the Environment initiative. R.G. was funded by the Natural Environment  
602 Research Council Science and Solutions for a Changing Planet Doctoral Training Programme (grant  
603 number NE/L002515/1), the CASE component of which is funded by the Zoological Society of  
604 London.

## 605 Author Contributions

606 R.Gumbs, C.L.G., J.R., N.R.O. conceived the study. R.Gumbs, C.L.G., J.R., M.H., S.M., U.R., W.J.

607 designed the analyses. R.Gumbs conducted the analyses. R.Grenyer, M.B., S.M., U.R. provided

608 reptile spatial data. C.L.G., J.R., M.B., M.H., N.R.O, S.M., U.R., W.J. provided technical support and

609 conceptual advice. C.L.G., J.R., N.R.O. supervised the study. R.Gumbs wrote the paper, with

610 substantial contributions from J.R, C.L.G., M.B., M.H , N.R.O., S.M., U.R., W.J.



## 611 Competing Interests statement

612 The authors have no competing interests to declare.
